1 **Identification of DIR1-dependant cellular responses required for guard cell systemic**  
2 **acquired resistance<sup>1</sup>**

3 Lisa David<sup>a,b</sup>, Jianing Kang<sup>a,b,c</sup>, Josh Nicklay<sup>d</sup>, Craig Dufrense<sup>e</sup>, and Sixue Chen<sup>a,b,f,g,2,3</sup>

4  
5 <sup>a</sup>Department of Biology, University of Florida, Gainesville, FL 32611, USA

6 <sup>b</sup>University of Florida Genetics Institute (UGI), Gainesville, FL 32610, USA

7 <sup>c</sup>College of Life Science, Northeast Agricultural University, Harbin 150030, China.

8 <sup>d</sup>Thermo Fisher Scientific, Somerset, NJ 08873, USA

9 <sup>e</sup>Thermo Training Institute, Thermo Fisher Scientific, West Palm Beach, FL 33407, USA

10 <sup>f</sup>Plant Molecular and Cellular Biology Program, University of Florida, Gainesville, FL 32610,  
11 USA

12 <sup>g</sup>Proteomics and Mass Spectrometry, Interdisciplinary Center for Biotechnology Research  
13 (ICBR), University of Florida, Gainesville, FL 32610, USA

14  
15 ORCID IDs: 0000-0003-2529-1863 (L.D.); 0000-0002-0425-8792 (J.K.); 0000-0002-7341-1260

16 (J.N.); 0000-0003-0785-7798 (C.D.); 0000-0002-6690-7612 (S.C.)

17

18 **Short title**

19 DIR1 in guard cell systemic acquired resistance.

20 **One-sentence summary**

21 DIR1 affects many biological processes in stomatal guard cells during systemic acquired  
22 resistance (SAR), as revealed by multi-omics, and it may function through transporting two 18C  
23 fatty acids during SAR.

24

<sup>1</sup> This material is based upon work supported by the National Science Foundation under Grant No. 1920420.

<sup>2</sup> Author for contact: [schen@ufl.edu](mailto:schen@ufl.edu)

<sup>3</sup> Senior author.

The author responsible for distribution of materials integral to the findings presented in this article in accordance with the policy described in the Instructions for Authors ([www.plantphysiol.org](http://www.plantphysiol.org)) is: Sixue Chen ([schen@ufl.edu](mailto:schen@ufl.edu)).

S.C., and L.D. conceived and designed the research; L.D., J.K., J.N., and C.D. carried out all experimental work; L.D. conducted data analysis, and L.D. and S.C. prepared manuscript.

## 25 ABSTRACT

26 After localized invasion by bacterial pathogens, systemic acquired resistance (SAR) is induced in  
27 uninfected plant tissues, resulting in enhanced defense against a broad range of pathogens.  
28 Although SAR requires mobilization of signaling molecules via the plant vasculature, the  
29 specific molecular mechanisms remain elusive. The lipid transfer protein-defective in induced  
30 resistance 1-1 (DIR1-1) was identified in *Arabidopsis thaliana* by screening for mutants that  
31 were defective in SAR. Here we demonstrate that stomatal response to pathogens is altered in  
32 systemic leaves by SAR, and this guard cell SAR defense requires DIR1. Using a multi-omics  
33 approach, we have determined potential SAR signaling mechanisms specific for guard cells in  
34 systemic leaves by profiling metabolite, lipid, and protein differences between guard cells in  
35 wild type and *dir1-1* mutant during SAR. We identified two 18C fatty acids and two 16C wax  
36 esters as putative SAR-related molecules dependent on DIR1. Proteins and metabolites related to  
37 amino acid biosynthesis and response to stimulus were also changed in guard cells of *dir1-1*  
38 compared to wild type. Identification of guard cell-specific SAR-related molecules may lead to  
39 new avenues of genetic modification/molecular breeding for disease resistant plants.

40

## 41 INTRODUCTION

42 Since the dawn of agriculture, epidemics of plant pathogens have caused devastating  
43 impacts to food production. The plant bacterial pathogen *Pseudomonas syringae* (including more  
44 than sixty known host-specific pathovars) infect a broad-ranging and agriculturally relevant

<sup>1</sup> This material is based upon work supported by the National Science Foundation under Grant No. 1920420.

<sup>2</sup> Author for contact: [schen@ufl.edu](mailto:schen@ufl.edu)

<sup>3</sup> Senior author.

The author responsible for distribution of materials integral to the findings presented in this article in accordance with the policy described in the Instructions for Authors ([www.plantphysiol.org](http://www.plantphysiol.org)) is: Sixue Chen ([schen@ufl.edu](mailto:schen@ufl.edu)).

S.C., and L.D. conceived and designed the research; L.D., J.K., J.N., and C.D. carried out all experimental work; L.D. conducted data analysis, and L.D. and S.C. prepared manuscript.

45 plants (Saint-Vincent *et al.*, 2020). Although it was first isolated from lilac (*Syringa vulgaris*) in  
46 1899, strains of *P. syringae* are found in many important crops, including beans, peas, tomatoes,  
47 and rice (Saint-Vincent *et al.*, 2020). *P. syringae* pv tomato (*Pst*) is a pervasive phytopathogenic  
48 bacterium that causes damage to a wide range of host crop species. It has been a useful model  
49 pathogen for studying host immune response since sequencing and annotation of the 6,397,126  
50 bp genome and two plasmids was funded by the NSF Plant Genome Research Program (Hirano  
51 *et al.*, 2000). *Pst* infects leaves for chemical nutrients such as carbohydrates, amino acids,  
52 organic acids, and ions that are leaked to the leaf apoplast during phloem loading/unloading  
53 (Hirano *et al.*, 2000). *Pst* causes bacterial brown spot disease in fruit and leaves, damaging crop  
54 plants. However, more devastating than brown spot is the unique ability of *Pst* to nucleate  
55 supercooled water to form ice. In species of *P. syringe* exhibiting the ice nucleation phenotype,  
56 ice-nucleation proteins on the outer membranes of bacterial membranes form aggregates that  
57 arrange water into arrays and promote phase change from liquid to solid. The frost-sensitive  
58 plants are injured when ice forms in leaf tissues at subzero temperature (Hirano *et al.*, 2000). *Pst*  
59 has been used extensively to study pathogen infection in numerous host plants including tomato  
60 and Arabidopsis. The latter is a reference dicot species with a short life-cycle, fully sequenced  
61 genome and rich genetic resources, providing an ideal system to understand how plants may be  
62 modified to improve their defense and productivity.

63        Systemic Acquired Resistance (SAR) is a long-distance plant immune response that  
64 improves immunity of systemic tissues after local exposure to a pathogen (Shah *et al.*, 2013;  
65 David *et al.*, 2019). Stomatal pores on leaf surfaces formed by pairs of guard cells are common  
66 entry sites for pathogenic bacteria. The specialized guard cells control the opening and closure of  
67 stomatal pores in response to environmental conditions (Melotto *et al.*, 2008). When stomatal

68 guard cells recognize *Pst* via pattern recognition receptors, stomata close within 1–2 hours and  
69 re-open after 3 hours. Re-opening is due to an effector molecule produced by some strains of *P.*  
70 *syringae* called coronatine (COR), which structurally mimics the active form of the plant  
71 hormone jasmonic acid-isoleucine (Melotto *et al.*, 2008). As a primary entry site for bacteria into  
72 the plant tissue, the stomata are at the frontline in plant immune defense (Zhu *et al.*, 2012). Our  
73 previous research showed that systemic leaves of SAR-induced (“primed”) wild type (WT)  
74 *Arabidopsis* have smaller stomata apertures than control plants, and that *Pst* does not widen  
75 stomata aperture in primed leaves, as it does in mock-treated plants (David *et al.*, 2020).  
76 Reduced stomatal aperture of primed plants correlated with reduced bacterial entry into leaf  
77 apoplastic spaces and reduced bacterial proliferation (David *et al.*, 2020).

78         Using a 3-in-1 extraction method to obtain proteins, metabolites and lipids from the same  
79 guard cell samples, we conducted multi-omics to identify SAR-related components in guard cells  
80 of WT *Arabidopsis* and a knockout mutant of Defective in Induced Resistance 1 (*DIR1*). *DIR1*  
81 encodes a putative apoplastic lipid transfer protein involved in SAR. *Arabidopsis* plants with  
82 mutations in *DIR1* exhibit WT-level local resistance to avirulent and virulent *Pst*, but  
83 pathogenesis-related gene expression is abolished in uninoculated distant leaves, and mutants fail  
84 to develop SAR (Maldonado *et al.*, 2002). Champigny *et al.* (2002) examined the presence of  
85 *DIR1* in petiole exudates from SAR-induced *Arabidopsis* leaves that were injected with *Pst*. The  
86 exudates from the *Pst* injected leaves showed the presence of *DIR1* beginning at 30 hour-post-  
87 infection (hpi) and peaked at ~ 45 hpi (Champigny *et al.*, 2002). Interestingly, the small 7kD  
88 *DIR1* protein was also detected in dimeric form in the petiole exudates (Champigny *et al.*, 2002).  
89 *DIR1* is conserved in other land plants including tobacco and cucumber, and several identified  
90 SAR signals are dependent on *DIR1* for long-distance movement, e.g., dehydroabietinal (DA),

91 azelaic acid (AzA) and glycerol-3-phosphate (G3P) (Adam *et al.*, 2018). Although most of the  
92 LTPs have basic pIs, DIR1 has an acidic pI of 4.25. Martinière *et al.*, (2018) found that the  
93 apoplastic environment has a more acidic pH than the cellular environment, ranging between 4.0  
94 to 6.3, so perhaps the acidic pI of DIR1 relates to its function in a more acidic environment  
95 where it may be neutral, similar to abscisic acid, which is also transported in the apoplast during  
96 stress response (Cornish & Zeevaart, 1985).

97 DIR1 is comprised of 77 amino acids, but despite having cysteine residues characteristic  
98 with lipid transfer proteins (LTP), it has low sequence identity with the previously characterized  
99 LTP1 and LTP2 in Arabidopsis. Lascombe *et al.* (2008) compared DIR1 to LTP1 by examining  
100 their interactions with various lipid substrates, including lysophosphatidyl cholines (LPCs) with  
101 various fatty acid chain lengths (LPC C14, LPC C16, and LPC C18). The results showed that  
102 DIR1 showed a greater affinity for LPCs with fatty acid chain lengths with >14 carbon atoms  
103 than LTP1. For the LPC with C18 fatty acid tails, the nonpolar C18 end was completely buried  
104 within the barrel structure of the DIR1 protein. DIR1 is unique among the LTPs due to its large  
105 internal cavity, capable of carrying two lipid molecules, and a proline-rich PxxPxxP motif  
106 (including Proline 24 to Proline 30). The Proline-rich regions of DIR1 may be involved in  
107 protein-protein interactions, as these regions are located at the surface of the protein and are fully  
108 accessible to the aqueous environment (Lascombe *et al.*, 2008). These regions are putative  
109 candidates for docking of a protein signaling partner, or to other cell components. These features  
110 may lend themselves well to its role at a SAR-induced LTP because DIR1 is hypothesized to  
111 form a complex with azelaic acid included 1 (AZI1) and localize to the endoplasmic reticulum  
112 and plasmodesmata (Yu *et al.*, 2013) and to function as a carrier for neutral fatty acids in the  
113 apoplast. Many “box-like” LTPs, like DIR1, have a “lid”-like structure that encloses the lipid

114 ligands inside the hydrophobic cavity during transport in the aqueous environment, and have  
115 structural motifs that undergo conformational shifts to allow for lipid loading and unloading  
116 (Wong *et al.*, 2019).

117         In this study, a multi-omics approach was employed to identify SAR signaling  
118 mechanisms specific for stomatal guard cells. The results show potential involvement of DIR1 in  
119 amino acid biosynthesis and carbon metabolism in guard cells during SAR. Importantly, four  
120 lipid components with long-chain fatty acids were identified as putative DIR1-related SAR  
121 signals in guard cells. The results of guard cell molecules in SAR response have not only led to  
122 new insights into the basic function of guard cells in the plant immune response, but also may  
123 facilitate biotechnology and marker-based breeding for enhanced crop defense.

124

125

## 126 RESULTS

### 127 Altered Stomatal Priming Response in *dir1* Correlates with Increased Bacterial 128 Colonization

129  
130 We have previously characterized that smaller stomata aperture in SAR-induced (primed)  
131 WT Arabidopsis plants improves immunity by allowing fewer bacteria to enter apoplastic spaces  
132 (David *et al.* 2020). In this study, we examined the role of DIR1 in priming of guard cells during  
133 SAR using the *dir1* knockout mutant and its WT ecotype WS. As previously reported for the  
134 Arabidopsis Columbia ecotype (Melotto *et al.*, 2006; David *et al.* 2021), the basal immune  
135 response of the mock-treated WT WS stomata closed after 1 h exposure to *Pst*, and then re-  
136 opened after 3 h. In contrast, primed WT WS leaves did not exhibit such stomatal immune  
137 responses and maintained a small stomatal aperture during the entire period of *Pst* exposure,  
138 similar to that previously observed in the Columbia WT (David *et al.*, 2020) (Figure 1A). There  
139 was no significant difference in the stomatal aperture from the primed WS leaves taken at 0, 1,  
140 and 3 h after *Pst* exposure (Figure 1B). However, guard cells of systemic leaves of *dir1* mutant  
141 plants showed an altered response to priming and remain more open at 0 h and 3 h compared to  
142 WT. It can be noted that due to the perception of pathogen-associated molecular patterns  
143 (PAMPs), the 1 h mock and primed WT and *dir1* apertures are similar. Specifically, average  
144 stomatal aperture of primed *dir1* leaves was 1.99 vs. 1.67  $\mu\text{m}$  in WT at 0 h. At 3 h it was 2.80 vs  
145 1.87  $\mu\text{m}$  for *dir1* and WT, respectively. Interestingly, mock-treated *dir1* also showed a larger  
146 stomatal aperture at 3 h after exposure to *Pst* when compared to mock-treated WT with an  
147 average of 3.60 and 2.69  $\mu\text{m}$ , respectively (Figure 1B).

148 In the *dir1* mutant, we found that both the control (mock) and primed *dir1* stomatal  
149 aperture differed from WT stomata with the same *Pst* treatments (Figure 1). In control plants  
150 (mock), we found that the initial (0 h) and PAMP response (1 h) of the *dir1* stomata was not

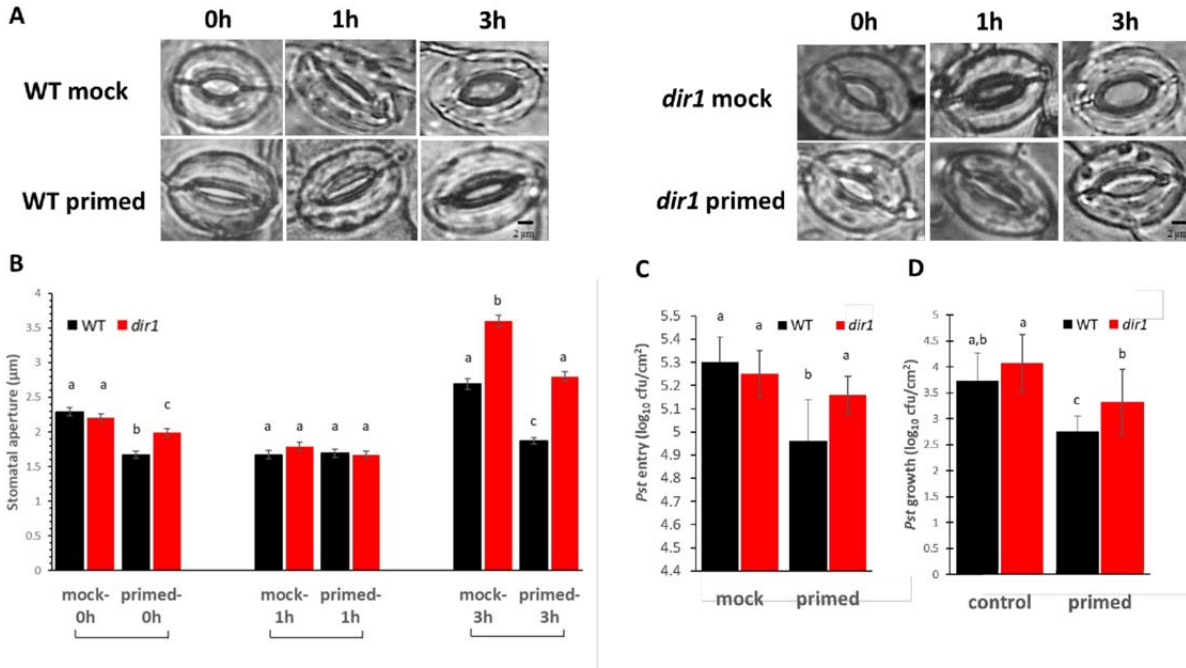

**Figure 1. Pathogen entry and growth differences in mock and primed *dir1* mutant and wild type (WT) Arabidopsis leaves.** A. Images showing representative stomatal apertures in mock and primed *dir1* and WT Arabidopsis leaves after 0, 1, and 3 h after secondary exposure to *Pst* DC3000. B. Quantitative measurements of 150 stomata from three replicate experiments. Statistically significant differences were marked by a, b, and c. C. *Pst* DC 3000 entry results obtained from nine biological replicates of primed and mock *dir1* and WT plants. The data are presented as average  $\pm$  standard error. D. *Pst* DC 3000 growth results obtained from nine biological replicates of primed and mock plants. The data are presented as average  $\pm$  standard error with all p-value < 0.05. cfu, colony forming unit.

151 statistically different from that of WT stomata to *Pst* exposure. However, at 3h after exposure to  
 152 *Pst*, the *dir1* mutant displayed a wider stomatal phenotype, indicating that coronatine secreted  
 153 from *Pst* had a greater effect on the *dir1* stomata than on the WT (Figure 1A and B). The effect  
 154 of priming on the stomatal aperture of *dir1* was also different than that of WT. Intriguingly, the  
 155 *dir1* primed stomata apertures at 0 h were significantly narrower than the control (mock) *dir1*  
 156 stomata, but less narrow than the WT primed stomata. The mock WT and *dir1* stomata apertures  
 157 had no significant difference at 0 h (2.29 and 2.20  $\mu$ m averages, respectively). After priming,  
 158 WT stomatal aperture decreased to 1.63  $\mu$ m, but the *dir1* stomata aperture was reduced to only  
 159 1.99  $\mu$ m, making the primed *dir1* stomata apertures significantly different from both the control  
 160 (mock) *dir1* stomata and the primed WT stomata. The 1 h response to PAMPs from *Pst* was



161 similar regardless of genotype (WT vs. *dir1*) or priming showing the specific response of  
162 stomatal closure after PAMP perception. However, at 3 hours post *Pst* treatment, the *dir1* primed  
163 stomata phenotype is significantly different from both the *dir1* control and the WT primed.  
164 Similar to the stomatal phenotype seen at 0 h, the *dir1* primed stomata had a narrower aperture  
165 (2.8  $\mu\text{m}$ ) than the *dir1* mock (3.6  $\mu\text{m}$ ) but were less narrow than the WT primed (1.87  $\mu\text{m}$ ). This  
166 demonstrates that although the *dir1* mutant appears to be less resistant to the coronatine from the  
167 *Pst* than the WT, it does have improved resistance with priming (Figure 1A and B).

168         Importantly, the altered stomatal phenotype of *dir1* directly correlates to *Pst* entry into  
169 the apoplastic spaces of the leaves and reduced stomatal immunity (Figure 1C). There was no  
170 significant difference in the number of *Pst* that were able to enter the apoplast of mock-treated  
171 WT, mock-treated *dir1*, or primed *dir1* leaves. Only primed WT stomata were able to reduce *Pst*  
172 entry after 3 h exposure to the bacterial pathogen (Figure 1C). Although overall immune  
173 response of the *dir1* mutant is reduced, *dir1* plants are still able to mount a SAR response, as  
174 demonstrated by the reduced *Pst* growth after 3 days of exposure in the *dir1* primed leaves  
175 (Figure 1D).

176         *Pst* entry and *Pst* growth are not significantly different in the mock-treated *dir1* vs WT  
177 plants, correlating to previous evidence that the *dir1* mutant is defective in SAR response, but  
178 not in basal pathogen response (Maldonado *et al.*, 2002). In primed leaves, stomata apertures  
179 correlate to increased *Pst* entry into the apoplast of leaves after 3 hours (Figure 1C) and  
180 increased growth of *Pst* after 3 days in the *dir1* mutant when compared to WT (Figure 1D). *Pst*  
181 entry is distinctive from *Pst* growth assays because it involves a more rapid time course (within  
182 hours after exposure) as opposed to *Pst* growth (measured after 3 days). At 3 h the primed WT  
183 plants maintain a smaller aperture upon exposure to *Pst*, while the *dir1* plants have larger

184 stomata apertures. As expected, after 3 h exposure to *Pst*, significantly more bacteria entered the  
185 apoplasts in the *dir1* primed leaves compared to the WT primed leaves (Figure 1C). To examine  
186 overall susceptibility to *Pst*, we measured bacterial growth in the mock and primed systemic  
187 leaves. After 3 days of *Pst* exposure, significantly more bacteria colonized the *dir1* primed leaves  
188 than the WT primed leaves. (Figure 1D).

### 189 **Differentially Abundant Proteins in the Primed *dir1* and WT Guard Cells**

190 Proteomic analysis of WT versus *dir1* primed guard cell samples taken from distal leaves  
191 3 days after *Pst* treatment identified 2229 proteins, each with more than one unique peptide (1%  
192 false discovery rate (FDR)). Of the identified proteins, 155 showed differential abundances in the  
193 primed WT guard cells compared to the *dir1* guard cells, with 25 increased in abundance and  
194 130 decreased in abundance, by > 2-fold and a P-value <0.05 (Figure 2A). Of the differentially  
195 abundant proteins in *dir1* primed versus (vs) WT primed, only seven were differentially  
196 abundant in *dir1*mock vs WT mock, indicating that most changes in protein abundance were due  
197 to SAR response, rather than to genotype differences.

198 Of the 155 differential proteins, 76 were mapped to the Arabidopsis KEGG pathway.  
199 Again, only three of the 76 were differentially abundant in *dir1* mock vs WT mock. They were  
200 phosphoribosylformylglycinamide cyclo-ligase (mapped to purine metabolism and  
201 biosynthesis of secondary metabolites), vacuolar-sorting protein (in endocytosis pathway), and  
202 40S ribosomal protein (in the ribosome pathway). Based on biological functions, the majority of  
203 differentially abundant proteins can be broadly categorized into two groups: carbon metabolism-  
204 related and amino acid biosynthesis-related. Carbon metabolism-related included 42 proteins  
205 from carbon metabolism (13), carbon fixation in photosynthetic organisms (6),  
206 glycolysis/gluconeogenesis (6), fructose and mannose metabolism (5), glyoxylate and  
207 dicarboxylate metabolism (3), pyruvate metabolism (3), starch and sucrose metabolism (3), and

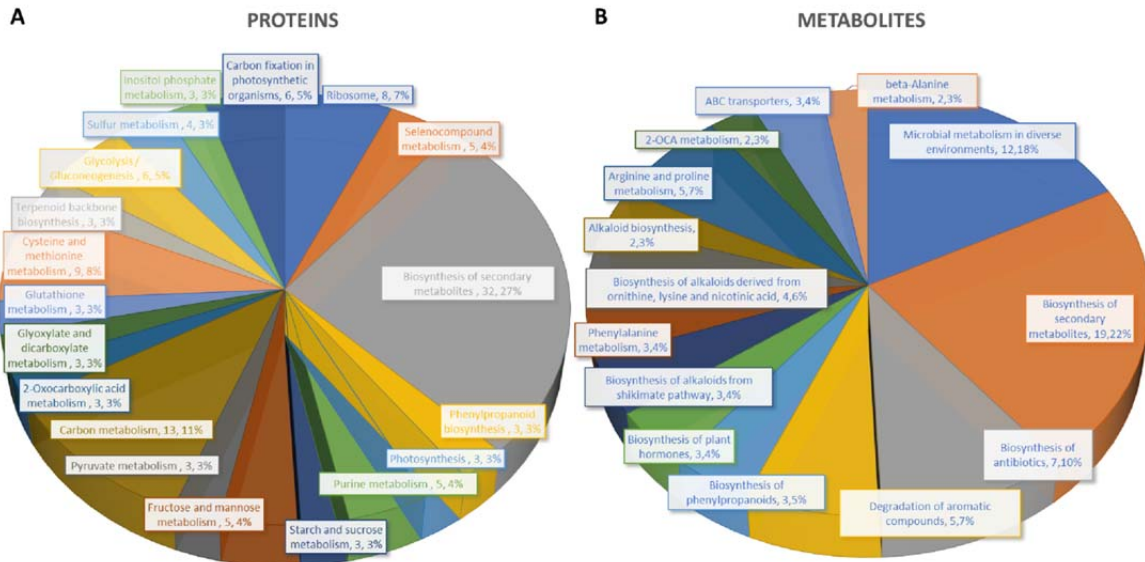

**Figure 2. Differential changes of proteins and metabolites in mock and primed *dir1* mutant and WT guard cells.**

**A.** Biological functions proteins found in KEGG pathways that are differentially abundant in WT versus *dir1* primed guard cells.

**B.** Biological functions metabolites found in KEGG pathways that are differentially abundant in WT versus *dir1* primed guard cells.

208 photosynthesis (3). Amino acid biosynthesis-related included cysteine and methionine  
 209 metabolism (9), and purine metabolism (5). Notably, differentially abundant proteins also  
 210 grouped into inositol phosphate metabolism (3) related to calcium signaling, terpenoid backbone  
 211 biosynthesis (3) related to sterols and carotenoids, and glutathione metabolism (3) related to  
 212 redox signaling (Figure 2A).

213 Carbon metabolism-related proteins included fructose-bisphosphate aldolase 3 (FBA3),  
 214 an enzyme involved in the reversible cleavage of fructose-1,6-bisphosphate into  
 215 dihydroxyacetone phosphate (DHAP) and glyceraldehyde-3-phosphate (GA3P), and two  
 216 triosephosphate isomerases (TIM and TPI) that catalyze the reversible isomerization between  
 217 DHAP and GA3P. These three enzymes exhibited 2-fold decreases in the *dir1* primed guard cells  
 218 compared to WT. Because of the overlap of the carbon metabolism and amino acid biosynthetic  
 219 KEGG pathways, some differentially abundant proteins were involved in both biological

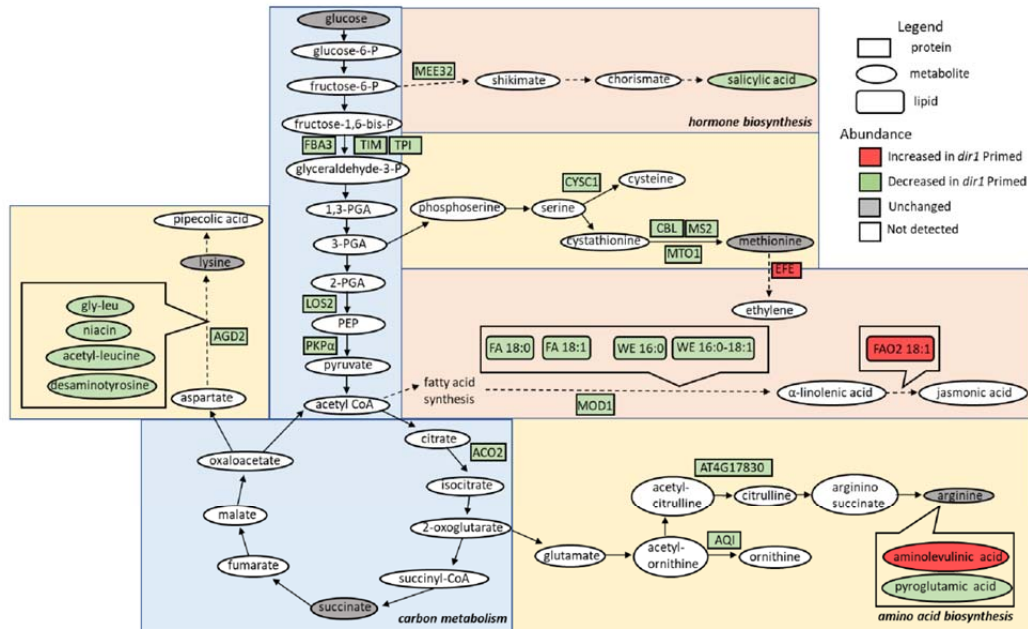

**Figure 3. Overview of the role of DIR1 in carbon metabolism, amino acid biosynthesis, and hormone biosynthesis in guard cells during systemic defense response.** Loss of *DIR1* results in altered abundance of proteins, metabolites, and lipids involved in carbon metabolism, amino acid biosynthesis, biosynthesis of plant hormones and secondary metabolites. Proteins that were decreased in *dir1* guard cells in the carbon metabolism metabolic pathway included: FBA3, TIM, TPI, LOS2, PKP $\alpha$ , and ACO2. Proteins that were decreased in *dir1* guard cells in the amino acid biosynthesis metabolic pathways included: AGD2, CYSC1, CBL, MS2, MTO1, AT4G17830, and AQI, and decreased metabolites in these pathways included: gly-leu, niacin, acetyl-leucine, desaminotyrosine, and pyroglutamic acid. One increased metabolite in *dir1* guard cells in the arginine biosynthesis pathway was aminolevulinic acid. Proteins that were decreased in *dir1* guard cells in the biosynthesis of hormones and secondary metabolites metabolic pathways included: MEE32 and MOD1, and decreased metabolites and lipids in these pathways included salicylic acid, stearic acid (FA 18:0), behenic acid (FA 18:1), cetyl oleate (WE 16:0/18:1) and ethyl myristate (WE 16:0). One protein, EFE, and one lipid, FAO2 18:1, were increased in these pathways in the *dir1* primed guard cells versus WT primed guard cells. Please refer to Supplemental Table 1 for abbreviations.

220 processes, including a pyruvate kinase family protein (PKP $\alpha$ ) and an enolase (LOS2). Both were  
 221 decreased more than 2-fold in *dir1* primed guard cells compared to WT primed (Figure 3).

222 The second largest group of differential proteins is related to amino acid metabolism and  
 223 other pathways with 32 differential proteins between *dir1* vs WT primed guard cells. Some of the  
 224 proteins are also identified in KEGG biosynthesis of secondary metabolites. For example,  
 225 Maternal Effect Embryo Arrest 32 (MEE32) is a putative dehydroquinone dehydratase and  
 226 putative shikimate dehydrogenase. It is found in multiple KEGG pathways including:  
 227 Biosynthesis of amino acids, Metabolic pathways, Phenylalanine, tyrosine and tryptophan  
 228 biosynthesis, and Biosynthesis of secondary metabolites. Another example is Aconitase 2

229 (ACO2) which is also found in multiple KEGG pathways, e.g., Biosynthesis of secondary  
230 metabolites, Carbon metabolism, 2-Oxocarboxylic acid metabolism, Glyoxylate and  
231 dicarboxylate metabolism, Biosynthesis of amino acids, Citrate cycle (TCA cycle), and  
232 Metabolic pathways.

233 Amino acid biosynthesis-related proteins included aberrant growth and death 2 (AGD2),  
234 which encodes a diaminopimelate aminotransferase involved in disease resistance against *Pst*  
235 and the lysine biosynthesis via diaminopimelate; methionine synthase 2 (MS2), cysteine synthase  
236 C1 (CYSC1) and cystathionine beta-lyase (CBL), which are all involved in cysteine and  
237 methionine biosynthesis; and an acetylornithine deacetylase involved in arginine biosynthesis.  
238 All mentioned amino acid biosynthesis-related proteins were decreased more than 2-fold in *dir1*  
239 primed guard cells compared to WT primed (Figure 3). Differentially abundant proteins involved  
240 in redox pathways included glutathione synthetase 2 (GSH2) and glutathione S-transferase TAU  
241 20 (GSTU20) related to redox signaling,

242 A pathway enrichment analysis was conducted for the differentially abundant proteins  
243 using AGRIGO Singular Enrichment Analysis (SEA) (Supplemental Figures S1 and S2). A  
244 graphical representation of GO hierarchical groups with all statistically significant terms classified  
245 levels of enrichment with corresponding colors. The functional enrichment was found in three  
246 general groups including response to stimulus, amino acid metabolic processes, and carbohydrate  
247 metabolic processes (Supplemental Figure S1). AGRIGO singular enrichment analysis for  
248 cellular components revealed enrichment in intracellular organelles including intracellular  
249 membrane bounded organelles, plastids, and chloroplast stroma (Supplemental Figure S2).  
250

## 251 **Differential metabolites in the primed *dir1* and WT guard cells**

252 A total of 728 metabolites were identified, and 55 metabolites showed significant  
253 changes after the priming treatment in the *dir1* versus WT guard cells, with 16 increased and 39  
254 decreased in abundance, by > 2-fold and a P-value <0.05 (Figure 2B). Of these differential  
255 metabolites, 34 were mapped to KEGG pathways. When grouping by biological function, the  
256 largest group of differentially abundant metabolites found in KEGG pathways were related to  
257 biosynthesis of secondary metabolites (19) (Figure 2B).

258 Several differential metabolites are involved in amino acid biosynthesis and hormone  
259 metabolism. For example, SA was decreased by more than 4-fold in the *dir1* primed guard cells  
260 compared to WT samples (Figure 3). However, it should be noted that in *dir1* mock versus WT  
261 mock the same ratio of decreased SA abundance exists. Metabolites involved in lysine  
262 biosynthesis were decreased more than 2-fold in the *dir1* primed guard cells compared to WT.  
263 They included gly-leu, niacin, acetyl-leucine, and desaminotyrosine. Metabolites involved in  
264 arginine biosynthesis were also changed. For example, pyroglutamic acid that decreased more  
265 than 2-fold, and aminolevulinic acid increased more than 4-fold in the *dir1* primed guard cells  
266 compared to WT guard cells. Malic acid, which is related to carbon metabolism, was increased  
267 1.8-fold in *dir1* versus WT primed guard cells, but was decreased by nearly 2-fold in *dir1* vs WT  
268 mock. When malic acid in the guard cell is pumped out to the apoplast, water moves out  
269 reducing turgor pressure in the guard cells and closing the stomata (Santelia and Lawson, 2016).

270

## 271 **Differential Lipids in the Primed *dir1* and WT Guard Cells**

272 A total of 1197 lipids were identified, and 88 lipids showed significant changes in guard  
273 cells after the priming of the *dir1* vs WT guard cells (with 37 increased and 49 decreased by > 2-  
274 fold). Of the differential lipids, 15 were mapped to KEGG pathways and their biological

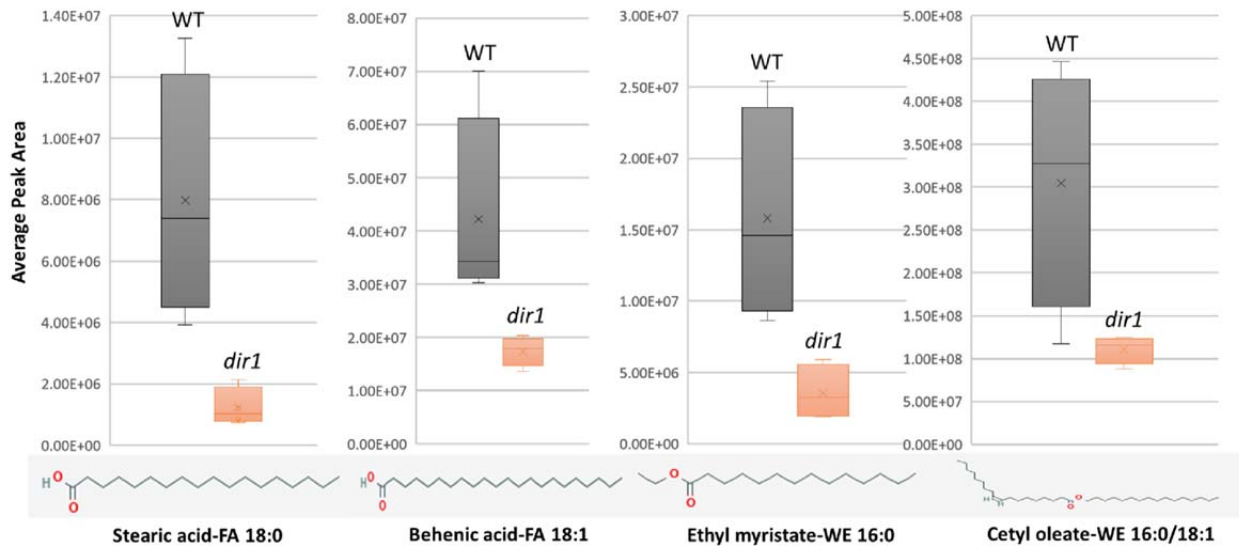

**Figure 4. Differentially abundant lipids identified in *dir1* and WT guard cells.** A. Bar graphs showing decreases of two long-chain fatty acids, stearic acid (FA 18:0) and behenic acid (FA 18:1) and two wax esters, cetyl oleate (WE 16:0/18:1) and ethyl myristate (WE 16:0) decreased > 2-fold in the *dir1* versus WT guard cells. Chemical structures of stearic acid (FA 18:0), behenic acid (FA 18:1), cetyl oleate (WE 16:0/18:1) and ethyl myristate (WE 16:0) are shown. The error bar represents standard deviation of the mean value.

275 functions largely fell into two categories: biosynthesis of fatty acids and biosynthesis of  
276 secondary metabolites. Notably these lipids included FAO2 18:1, isoleukotoxin diol (DiHOME)  
277 involved in linoleic acid metabolism (a precursor for jasmonic acid). It was increased 2.1-fold in  
278 the *dir1* vs WT primed guard cells. We also found two long-chain fatty acids (FA) including  
279 stearic acid (FA 18:0) and behenic acid (FA 18:1) and two wax esters (WE) including cetyl  
280 oleate (WE 16:0/18:1) and ethyl myristate (WE 16:0). They were all decreased more than 2-fold  
281 in the *dir1* vs WT guard cells (Figure 3, Figure 4). Ethyl myristate is a long-chain fatty acid ethyl  
282 ester resulting from the condensation of the carboxy group of myristic acid with  
283 the hydroxy group of ethanol. Palmityl oleate is a wax ester obtained by the condensation of  
284 hexadecan-1-ol with oleic acid. Interestingly, both stearic acid and behenic acid were not  
285 significantly changed in the *dir1* mock vs WT mock, indicating that this change in FA amount is

286 due to priming, further supporting that they may be the 18C lipid signals potentially transported  
287 by DIR1. As to the two wax esters (cetyl oleate and ethyl myristate), they were already more  
288 than 2-fold reduced in *dir1* mock vs WT mock, indicating genotypic difference rather than  
289 priming effect.

290

### 291 **DIR1 localization and protein interactions with DIR1**

292 Using the Interaction Viewer at the Bio-Analytic Resource for Plant Biology (BAR)  
293 ([bar.utoronto.ca/eplant](http://bar.utoronto.ca/eplant)), localizations of DIR1 and proteins that interact with DIR1  
294 (AT5G48485) were determined (Figure 5A). Cellular localizations of DIR1 included  
295 peroxisomes, Golgi apparatus, endoplasmic reticulum, and plasma membrane. Protein-protein  
296 interactions that have been experimentally determined, indicated by the straight, green lines,  
297 occur between DIR1 and both ubiquitin-like protein (AT1G68185) and chitin elicitor receptor  
298 kinase 1 (CERK1, AT3G21630). Based on Araport 11 annotation, CERK1 is a LysM receptor-  
299 like kinase, and has a typical RD signaling domain in its catalytic loop and possesses  
300 autophosphorylation activity. GO biological functions of CERK1 include perception and  
301 transduction of the chitin oligosaccharide elicitor in innate immune response to fungal  
302 pathogens. CERK1 is located in the plasma membrane and cytoplasm and phosphorylates LIK1,  
303 an LLR-RLK that is involved in innate immunity (Rebaque *et al*, 2021; Junková *et al*, 2021).  
304 However, neither the ubiquitin-like protein nor CERK1 were identified in our proteomics results  
305 (Supplemental Table S1).

306 The GeneMANIA tool at the BAR resource was used to predict other genes/gene  
307 products associated with DIR1. Predicted, co-expression, and genetic interaction networks found  
308 associated genes/gene products (Figure 5B). In addition to DIR1, our proteomics identified  
309 several lipid transfer proteins including LTP1, LTP5, LTP6, Plastocyanin (PETE1) and LTPG6



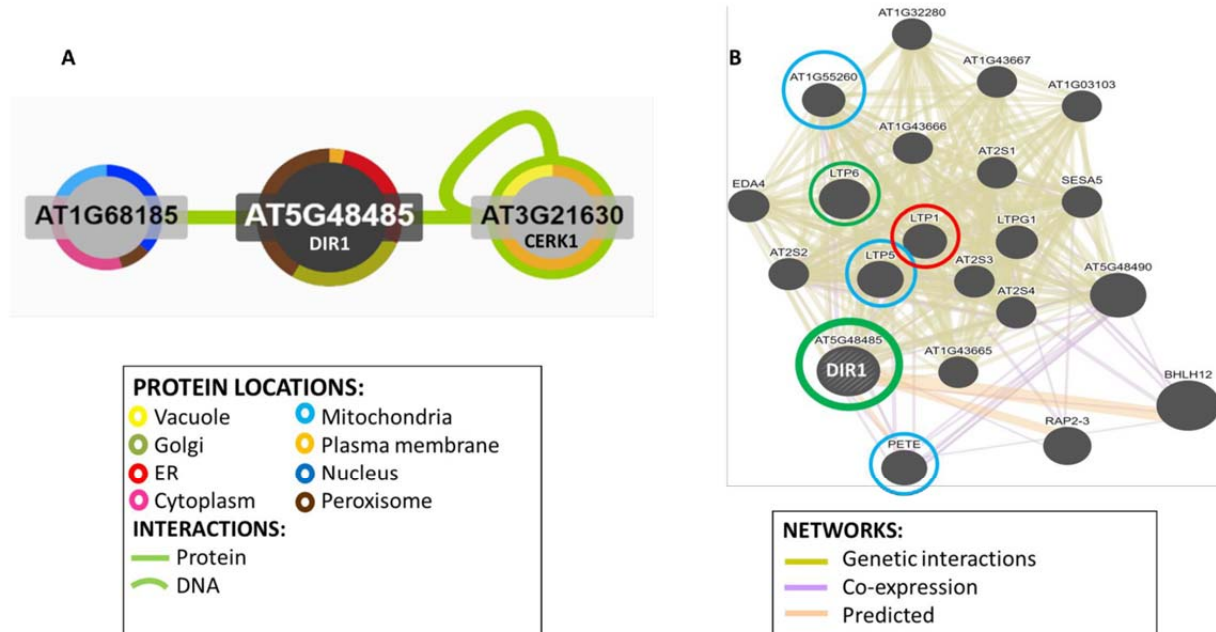

**Figure 5. Identification of potential interacting proteins with DIR1.** A. Protein interaction image was generated using Interaction Viewer at [bar.utoronto.ca/eplant](http://bar.utoronto.ca/eplant). Border color indicates protein location. Green lines indicate protein and DNA interactions that have been experimentally determined. B. GeneMANIA tool from [bar.utoronto.ca/eplant](http://bar.utoronto.ca/eplant) was used to predict other genes/gene products associated with DIR1 (AT5G48485). Predicted, co-expression, and genetic interaction networks found associated genes/gene products. Proteins identified in guard cell samples are circled. Circle colors indicate increased (red), decreased (green), or unchanged (blue) proteins in *dir1* versus WT primed guard cells.

310 (AT1G55260) from guard cell samples. LTPG6 is a glycosylphosphatidylinositol-anchored lipid  
 311 transfer protein involved in defense response to fungus. LTP1 (AT2G38540), is a non-specific  
 312 lipid transfer protein that binds calmodulin in a  $\text{Ca}^{2+}$ -independent manner. LTP1 is specifically  
 313 expressed in the L1 epidermal layer and is localized to the cell wall (Fahlberg *et al.*, 2019).  
 314 LTP1, LTP5 (AT3G51600) and LTP6 (AT3G08770) are predicted to encode pathogenesis-  
 315 related (PR) proteins and are members of the PR-14 protein family (Sels *et al.*, 2008). The  
 316 mRNA of LTP1 is cell-to-cell mobile (Bogdanov *et al.*, 2016). PETE1 is one of two Arabidopsis  
 317 plastocyanins (PETE1 and PETE2). Its mRNA expression is one-tenth of the level of *PETE2*.  
 318 Although PETE2 is involved in copper homeostasis, PETE1 is not responsive to increased  
 319 copper levels, but it may participate in electron transport during copper-limiting conditions

320 (Abdel-Ghany, 2009; Weigel *et al.*, 2003). DIR1 was not present in our *dir1* knockout mutant  
321 samples, and LTP6 was significantly decreased in the *dir1* versus WT after priming. LTP1 was  
322 increased in *dir1* versus WT, and LTP5, PETE and LTPG6 were unchanged during priming in  
323 *dir1* versus WT guard cells (Figure 5B). DIR1 was associated with LTP1, LTP5, LTP6 and  
324 LTPG6 via genetic interaction networks, and with PETE1 via predicted and co-expression  
325 networks (Figure 5B).

326

327

## 328 **DISCUSSION**

### 329 ***dir1* is Deficient in Both Local and Systemic Guard Cell Immune Responses**

330           Although SAR has largely been studied at the level of leaf or whole plant level, we have  
331 recently shown evidence that SAR affects guard cell response to the bacterial pathogen *Pst*  
332 (David *et al.*, 2020). DIR1 is required for movement of several chemically diverse SAR signals  
333 including DA, G3P, AzA, and possibly MeSA (Adam *et al.*, 2018). As we have recently reported  
334 stomatal movement and guard cell molecular changes underlying stomatal SAR responses  
335 (David *et al.*, 2020), here we first characterized the stomatal movement phenotype of the *dir1*  
336 mutant versus WT in response to *Pst*. Results from our work and previous studies (Melotto *et al.*,  
337 2008; Pang *et al.*, 2020) clearly showed that stomatal guard cells from different genotypes of  
338 Arabidopsis (WS and Columbia) exhibited similar basal immune responses. After priming for  
339 three days, stomata from the WT WS leaves had an initial narrow aperture compared to control  
340 (mock) stomata, and they maintain this narrow aperture during PAMP perceptions at 1 hour and  
341 also at 3 hours after *Pst* treatment. This result is also similar to the Columbia WT plants (David  
342 *et al.*, 2020),

343           In the *dir1* mutant, at 3h after exposure to *Pst* the *dir1* mutant displayed a larger stomatal  
344 aperture, indicating that coronatine secreted from *Pst* had a greater effect on the *dir1* guard cells  
345 than on the WT. The effect of priming on the *dir1* stomata was also different from the WT  
346 stomata. The *dir1* primed stomata apertures at 0 h were narrower than the mock *dir1*, but less  
347 narrow than the WT primed stomata. At 3 h post *Pst* treatment, the *dir1* primed stomatal aperture  
348 is smaller than mock-treated, but less narrow than the WT primed. The altered stomatal aperture  
349 of *dir1* directly correlates to *Pst* entry into the apoplastic space (Figure 1). Clearly, although the  
350 *dir1* mutant appears to be less resistant to the coronatine than the WT, it does have improved  
351 resistance after priming. This result is consistent with previous literature, which showed a partial

352 SAR-competent phenotype of *dir1* (Champigny *et al.*, 2013). Although the partial SAR-  
353 competent phenotype of *dir1* was able to reduce the *Pst* growth, it did not decrease the entry of  
354 *Pst* via the stomatal pores. Therefore, *dir1* is deficient in both local and systemic guard cell  
355 immunity.

### 356 **DIR1 affects Guard Cell Carbon Metabolism and Amino Acid Biosynthesis During SAR**

357 Based on our multi-omic results, the majority of the differential proteins and metabolites  
358 (including lipids) were in the carbon metabolism, amino acid biosynthesis and secondary  
359 metabolite biosynthesis pathways (Figures 2 and 4). Most of the molecules were lower in the  
360 primed *dir1* guard cells than the primed WT guard cells. These results indicate that DIR1-  
361 dependent SAR is necessary for regulation of amino acid biosynthesis and secondary metabolites  
362 in guard cells. It also indicates that guard cells attenuate their carbon metabolic pathways to  
363 divert resources to amino acid biosynthesis in response to priming in WT, and that this process is  
364 at least partially dependent on DIR1 in guard cells. In addition, the differential proteins enriched  
365 for plastid and chloroplast components again support alterations in carbon metabolic pathways  
366 induced by SAR.

367 One interesting aspect of our results is that we did not identify changes in pathogenesis-  
368 related (PR) proteins in the *dir1* primed guard cells. Similarly, the abundance of AzA was not  
369 significantly different in the primed *dir1* versus WT guard cells. On the other hand, the key  
370 regulatory SAR metabolite SA showed a 50-fold decrease in the primed *dir1* vs WT guard cells.  
371 Previously, we reported that primed guard cells in uninoculated leaves of Arabidopsis narrowed  
372 stomatal apertures, reduced entry of *Pst* into the leaves, and had increased SA in primed guard  
373 cells compared to mock guard cells (David *et al.*, 2020). The lower SA in the primed *dir1* guard  
374 cells correlates well with our previous findings and demonstrates that DIR1 is required to  
375 transmit the long-distance SAR signal to the guard cells in uninfected leaves and increase SA in

376 the primed guard cells. Recently, translocation of SA from primary infected tissue to distal  
377 uninfected leaves was shown to likely occur via the apoplastic space between the cell wall and  
378 plasma membrane (Lim *et al.*, 2016). Unlike the SAR-induced signals G3P and AzA, which  
379 were preferentially transported via symplastic transport and through plasmodesmata, pathogen  
380 infection resulted in increased SA accumulation in the apoplastic compartment, and SAR-  
381 induced accumulation was unaffected by defects in symplastic transport via plasmodesmata (Lim  
382 *et al.*, 2016). Mature guard cells have callose depositions that block plasmodesmata, and thus  
383 SAR-signals that can be transported via the apoplast, rather than the symplast, would logically be  
384 able to affect the guard cells during SAR. Alternatively, SA could be *de novo* synthesized in the  
385 primed guard cells. This SA biosynthesis is also affected by *DIR1* mutation. How DIR1 regulates  
386 SA biosynthesis is not known.

387

### 388 **Lipidomics Revealed Four Long-Chain Fatty Acids Associated with DIR1**

389 Previously, we found that fatty acids were increased in the primed WT guard cells (David  
390 *et al.*, 2020). Here we compared the levels of lipids found in primed WT guard cells to those in  
391 the *dir1* mutant. Our goal was to identify lipids in guard cells that are dependent on DIR1 during  
392 priming. DIR1 has been characterized as a lipid transfer protein, and the core of its structure  
393 forms a left-handed super helical arrangement of four  $\alpha$ -helices building the hydrophobic central  
394 cavity. Lascombe *et al.* (2008) demonstrated that DIR1 showed a greater affinity for LPCs with  
395 fatty acid chain lengths with >14 carbon atoms and that nonpolar C18 fatty acid tails were  
396 completely buried within the barrel structure of the DIR1 protein, presumably allowing non-  
397 polar fatty acids to be transported in polar cellular environments. The two long-chain fatty acids  
398 (stearic acid (FA 18:0) and behenic acid (FA 18:1)) and two wax esters (cetyl oleate (WE  
399 16:0/18:1) and ethyl myristate (WE 16:0)) were all decreased > 2-fold in the *dir1* guard cells

400 compared to WT guard cells (Figures 3 and 4). As both stearic acid and behenic acid were not  
401 significantly changed in *dir1* mock vs WT mock, this change in FA levels is likely due to  
402 priming, further supporting that they may be the 18C lipid signals transported by the DIR1.  
403 Further analysis is required to determine the relationship between DIR1 and these 18C fatty  
404 acids. It is reasonable to propose that DIR1 may transfer stearic and behenic acid to guard cells  
405 during SAR. Previously we identified an increase in palmitic acid and its derivative 9-  
406 (palmitoyloxy) octadecanoic acid in primed WT guard cells and proposed that fatty acids could  
407 allow for the development of lipid rafts or other alterations of membrane structure in guard cells,  
408 modulating stomatal immune responses (David *et al.*, 2020).

409 Plant wax esters are neutral lipids with long-chain (C<sub>16</sub> and C<sub>18</sub>) or very-long-chain  
410 (C<sub>20</sub> and longer) carbon structures and are mostly found in cuticles where they provide a  
411 hydrophobic coating to shoot surfaces (Li *et al.*, 2008). Recently the cuticle has been shown to  
412 regulate transport of SA from pathogen-infected to uninfected parts of the plant via the apoplast  
413 during SAR (Lim *et al.*, 2020). Lim *et al.* (2020) found that cuticle-defective mutants with  
414 increased transpiration and larger stomatal apertures reduced apoplastic transport of SA and  
415 caused defective SAR response. It is interesting to note that our results demonstrate that WT  
416 stomata maintain narrow stomata apertures after priming, potentially to reduce transpiration and  
417 increase water potential, and possibly routing SA to the apoplast. The *dir1* mutant, on the other  
418 hand, had larger stomatal apertures, perhaps resulting in defect in SA movement in the apoplast.  
419 It is not known whether the mutant has defect in cuticle structure due to the decreases of wax  
420 esters (cetyl oleate and ethyl myristate). However, since the decreased cetyl oleate and ethyl  
421 myristate in *dir1* guard cells after priming were already >2-fold reduced in *dir1* mock vs WT  
422 mock, this was a genotypic difference, rather than a result of priming. If, as reported by Lim *et*

423 *al.* (2020), defects in the cuticle reduce transport of SA, the reduced wax esters in *dir1* vs WT  
424 could explain the reduce SA in *dir1* guard cells (both mock and primed) and contribute to the  
425 SAR defect of the *dir1* mutant.

426 One cuticle-defective mutant was a knockout of *MOD1*, an acyl carrier protein (ACP)  
427 which transports a growing FA chain between enzyme domains of FA synthase during FA  
428 biosynthesis. The *mod1* mutant is defective in the key FA biosynthetic enzyme enoylACP  
429 reductase and has reduced levels of multiple FA species and total lipids (Lim *et al.*, 2020).  
430 Interestingly, we also found that MOD1 was > 2-fold lower in *dir1* guard cells versus WT guard  
431 cells after priming (Figure 3). This result supports our previous results that FA synthesis plays a  
432 key role in SAR priming in guard cells (David *et al.*, 2020). However, how DIR1 affects MOD1  
433 and FA biosynthesis awaits further investigation.

434

## 435 CONCLUSION

436 Guard cells that control stomatal aperture respond to various abiotic and biotic signals  
437 and have membrane-bound pattern recognition receptors that perceive bacterial pathogens. One  
438 neglected area of SAR research has been the role that stomatal guard cells play in SAR. This  
439 work investigates the role of SAR-related lipid transfer protein DIR1 in guard cell-specific SAR.  
440 After priming and also after exposure to the bacterial pathogen *Pst*, stomata of WT remain at a  
441 narrow aperture. In contrast, the *dir1* mutant showed defects in stomatal closure. Based on the  
442 multi-omics data, proteins and metabolites related to amino acid biosynthesis, secondary  
443 metabolism and response to stimulus were altered in guard cells of *dir1* compared to WT. For  
444 example, several proteins in the methionine biosynthesis pathway and a protein related to  
445 ethylene biosynthesis were decreased in the *dir1* primed guard cells compared to WT. It is  
446 known that ethylene is biosynthesized via methionine and ethylene plays a role in SA-regulated

447 stomatal closure by mediating ROS and nitric oxide (Wang *et al.*, 2020). A putative shikimate  
448 dehydrogenase was also decreased in the *dir1* guard cells after priming. As SA is a product of the  
449 shikimate pathway and was also lower in *dir1* guard cells, the slow-down in this pathway could  
450 explain the decrease of stomatal closure and defense observed in the *dir1* mutant during priming.  
451 Our lipidomics results highlighted a role for fatty acid signaling and cuticle wax esters in the  
452 primed guard cells, i.e., two 18C fatty acids as putative lipid mobile signals and two 16C wax  
453 esters dependent on DIR1. These results are also correlated to a decrease in the MOD1 in the  
454 *dir1* guard cells. As *mod1* mutants have been shown to have cuticle defects and reduced transport  
455 of SA to distal tissue during SAR, this relates to the decreased SA in the *dir1* guard cells. Multi-  
456 omics has shown utility in discovering DIR1-dependent molecular networks in stomatal  
457 immunity. The improved knowledge may facilitate effort in biotechnology and marker-based  
458 breeding for enhanced plant disease resistance.

459

## 460 MATERIALS AND METHODS

### 461 Plant Growth and Bacterial Culture

462 *A. thaliana* WS seeds were obtained from Arabidopsis Biological Research Center (Ohio,  
463 USA). They were suspended in deionized H<sub>2</sub>O and vernalized at 4 °C for two days before  
464 planting. The seeds were cultivated in soil and grown in controlled environmental chambers in  
465 short day (8-hour light/16-hour dark) environment. The temperatures during the light and dark  
466 periods were 22 °C and 20°C, respectively. Incandescent bulbs capable of emitting 140 μmol m<sup>-2</sup>  
467 s<sup>-1</sup> at the leaf surface were used in the growth chamber with a relative humidity of about 60%. A  
468 dome was placed over the flat until seeds began germination. After 2 weeks of growth, seedlings



469 were transferred into individual pots. Plants were watered weekly, kept in the chamber until  
470 mature rosette (stage 3.9), and observed at 5-weeks of age.

471 *Pseudomonas syringae* pv. *tomato* DC3000, the model pathogen for Arabidopsis SAR  
472 induction was used for the experiments. Agar media plates were made using King's B media  
473 protocol. A 1-liter solution contained 20 g Protease peptone No. 3, 1.5 g K<sub>2</sub>HPO<sub>4</sub> (s), 0.75 g  
474 MgSO<sub>4</sub> (s), 10 mL glycerol, 15 g agar, and deionized H<sub>2</sub>O King's B Media was autoclaved, and  
475 antibiotics Rifampicin (25 mg/L) and Kanamycin (50 mg/L) were added once the solution is  
476 cooled. Solution with agar was used for plates and *Pst* colonies were streaked on this medium  
477 and incubated for overnight at 28 °C. *Pst* colonies were grown in the same King's B media  
478 without agar in solution overnight, pelleted by centrifugation at 6000x g for 10 min, and used for  
479 treatment of Arabidopsis plants.

480

#### 481 **Stomata Aperture Measurements**

482 Primary inoculation occurred via needless syringe infiltration, where the leaves were  
483 either primed with *Pst* DC3000 (OD<sub>600</sub>= 0.02) suspended in 10 mM MgCl<sub>2</sub> or mock-treated with  
484 10 mM MgCl<sub>2</sub>. At 3 days post inoculation, the leaf opposite to the injected leaf was detached for  
485 a secondary treatment. In the secondary treatment, the leaves were either floated in 10 mM  
486 MgCl<sub>2</sub> or in *Pst* DC3000 (OD<sub>600</sub>= 0.2, in 10 mM MgCl<sub>2</sub>) in small petri-dishes. Three leaves were  
487 used for each time point and secondary treatment group, and only one leaf was collected from  
488 each plant. Stomatal apertures were measured at three time points: 0 h, 1 h and 3 h. The leaves  
489 were collected and peeled using clear tape. The peel from abaxial side of the leaf was then placed  
490 on a microscope slide and images were collected using a DM6000B light microscope (Leica,  
491 Buffalo Grove, IL USA) This experiment was repeated 3 times to image 50 stomata from each

492 replicated treatment and a total of 150 stomata measurements from 3 independent replicates were  
493 analyzed for each time point. Stomatal apertures were measured using ImageJ software (National  
494 Institutes of Health, Bethesda, MD, USA, (<http://imagej.nih.gov/ij/>)).

495

#### 496 ***Pst* DC3000 Entry and Growth Assays**

497 To measure how much bacteria entered the apoplast after three hours, nine plants from  
498 three independent experiments were grown to 5-weeks and prime-treated via infiltration with  
499 either *Pst* DC3000 ( $OD_{600} = 0.02$ ) or mock-treated with 10 mM  $MgCl_2$ . Three days later, the leaf  
500 opposite to the one infected was detached and floated in *Pst* ( $OD_{600} = 0.2$ ) solution for both mock  
501 and primed plants. After 3 h, the leaf was placed in a Falcon tube with 0.02% Silwet (Su *et al*,  
502 2017), vortexed for 10 seconds, dried with sterile Kim wipes, wrapped in clean aluminum foil,  
503 and taken to Laminar flow hood for aseptic treatment. In the hood, an autoclaved hole-puncher  
504 was used to obtain one disk from each leaf (0.5 cm diameter), and the disk was placed in 100  $\mu$ L  
505 sterile  $H_2O$ . Each leaf disk was then ground using an autoclaved plastic grinding tip, and 10  $\mu$ L  
506 of the solution was collected to make a 1:1000 serial dilution. From the dilution, 100  $\mu$ L was  
507 collected and plated on agar media containing Rifampicin (25 mg/L) and Kanamycin (50 mg/L).  
508 After 2 days of incubation at 28 °C, the colonies on the plate were counted. The experiment was  
509 done 3 times with 3 replicates each time. The bacterial counts of nine replicates were used to  
510 calculate mean and standard error.

511 *Pst* growth experiment determines how much bacteria grow in the apoplast after 3 days.  
512 *Arabidopsis* plants (9 independent replicates) were grown to 5-weeks and either mock or prime-  
513 treated. After three days of treatment, the rosette leaves were sprayed with *Pst* DC3000 ( $OD_{600} =$   
514 0.2) and a dome was put on top for 24 hours. After 24 hours, the dome was removed, and the

515 plants were left in growth chamber for another 48 hours. One opposite leaf of each plant was  
516 then detached, washed in 0.02% Silwet, and one disk was taken from leaf to make a 1:1000 serial  
517 dilution and plate it on media. Colonies were counted to determine how much bacteria were able  
518 to grow in the apoplast. The experiment was repeated 3 times with 3 replicates each time. The  
519 bacterial counts from the nine replicates were used to calculate mean and standard error.

520

### 521 **Isolation of Enriched Guard Cells for Multi-omics Experiments**

522 Enriched guard cell samples were prepared as described in Kang *et al* (2021). Briefly, for  
523 each sample 144 mature leaves were collected from 36 individual plants. After removing the  
524 midvein with a scalpel, the leaves were blended for 1 minute in a high-speed blender with 250  
525 mL of deionized water and ice. The sample was then filtered through a 200  $\mu$ m mesh filter. This  
526 process was repeated 3 times to obtain intact stomatal guard cells, which were collected  
527 immediately into 15 mL Falcon tubes, snap frozen in liquid nitrogen, and stored in -80 °C. Guard  
528 cell viability and purity was verified by staining with fluorescein diacetate and neutral red dye,  
529 which showed that guard cells remained intact and viable.

530

### 531 **3-in-1 Extraction of Proteins, Metabolites and Lipids from Guard Cell Samples**

532 We adapted a protocol to simultaneously extract metabolites, lipids, and proteins from a  
533 single whole leaf or guard cell sample (Kang *et al.*, 2021). Briefly, a chloroform and methanol  
534 solution is added to samples that are in an aqueous isopropanol solution. This process induces the  
535 formation of two solvent layers – an upper aqueous phase containing hydrophilic metabolites,  
536 and a lower organic phase containing lipids and other hydrophobic metabolites. The proteins are  
537 at the interphase. Components were normalized from internal standards that were added during  
538 the first step of extraction. Internal standards included, for proteins: 60 fmol digested bovine

539 serum albumin (BSA) peptides per 1  $\mu\text{g}$  sample protein; for metabolites: 10  $\mu\text{L}$  0.1  $\text{nmol}/\mu\text{L}$   
540 lidocaine and camphorsulfonic acid; and for lipids: 10  $\mu\text{L}$  0.2  $\mu\text{g}/\mu\text{L}$  deuterium labeled 15:0–  
541 18:1(d7) phosphatidylethanolamine (PE) and 15:0–18:1(d7) diacylglycerol (DG). The lipid  
542 extracts were dried under nitrogen gas to prevent oxidation and stored in  $-80\text{ }^\circ\text{C}$ . The lipid  
543 extract was later dissolved in 1 mL isopropanol for LC-MS/MS analysis. Aqueous metabolites  
544 were lyophilized and placed at  $-80\text{ }^\circ\text{C}$ . Aqueous metabolite pellets were later solubilized in 100  
545  $\mu\text{L}$  0.1% formic acid for LC-MS/MS analysis. Protein components were collected by  
546 precipitation in cold 80% acetone in the centrifuge tubes at  $-20\text{ }^\circ\text{C}$  overnight. Acetone was  
547 removed using glass pipettes, and the tubes with the protein samples were dried in a speedvac.  
548

#### 549 **Protein Digestion and LC-MS/MS**

550 Four biological replicates of mock and SAR primed guard cell samples from WT and  
551 *dir1* genotypes were prepared for proteomic experiments. Protein samples were resuspended in  
552 50 mM ammonium bicarbonate, reduced using 10 mM dithiothreitol (DTT) at  $22\text{ }^\circ\text{C}$  for 1 h, and  
553 alkylated with 55 mM chloroacetamide in darkness for 1 h. Trypsin (Promega, Fitchburg, WI)  
554 was added for digestion (w/w for enzyme : sample = 1 : 100) at  $37\text{ }^\circ\text{C}$  for 16 h. The digested  
555 peptides were desalted using micro ZipTip mini-reverse phase (Millipore), and then lyophilized  
556 to dryness. The peptides were resuspended in 0.1% formic acid for mass spectrometric analysis.

557 The bottom-up proteomics data acquisition was performed on an EASY-nLC 1200  
558 ultraperformance liquid chromatography system (Thermo Scientific) connected to an Orbitrap  
559 Exploris 480 with FAIMS Pro instrument (Thermo Scientific, San Jose, CA). The peptide  
560 samples were loaded in 5  $\mu\text{L}$  injections to an IonOpticks Aurora 0.075x250mm, 1.6  $\mu\text{m}$  120 $\text{\AA}$   
561 analytical column and column temperature was set to  $50\text{ }^\circ\text{C}$  with a sonation oven. The flow rate  
562 was set at 400 nL/minute with solvent A (0.1% formic acid in water) and solvent B (0.1% formic

563 acid and 80% acetonitrile) as the mobile phases. Separation was conducted using the following  
564 gradient: 3-19% B in 108 min; 19-29% B in 42 min; 29-41% B in 30 min. The full MS1 scan  
565 (m/z 350-1200) was performed on the Orbitrap Exploris with a resolution of 120,000. The  
566 FAIMS voltages were on with a FAIMS CV (V) set at -50. The RF Lens (%) was set to 40 and a  
567 custom automatic gain control (AGC) target was set with a normalized AGC target (%) set at  
568 300. Monoisotopic precursor selection (MIPS) was enforced to filter for peptides with relaxed  
569 restrictions when too few precursors are found. Peptides bearing +2 - 6 charges were selected  
570 with an intensity threshold of  $5e3$ . A custom dynamic exclusion mode was used with 60 s  
571 exclusion duration and isotopes were excluded. Data-dependent MS/MS was carried out with a 3  
572 FAIMS CV loop (-50, -65, -80). MS/MS orbitrap resolving power was set to 60,000 with 2 m/z  
573 quadrupole isolation. Top speed for data dependent acquisition within a cycle was set to 118 ms  
574 maximum injection time. The MS/MS mass tolerance was set to 10 ppm. Fragmentation of the  
575 selected peptides by higher energy collision dissociation (HCD) was done at 30% of normalized  
576 collision energy and a 2 (m/z) isolation window. The MS2 spectra were detected by defining first  
577 mass scan range as 120 m/z and the maximum injection time as 118 ms.

578

### 579 **Metabolite and Lipid Preparation and LC-MS/MS**

580 The untargeted metabolomic approach used the high resolution Orbitrap Fusion Tribrid  
581 mass spectrometer (Thermo Fisher Scientific, Waltham, MA, USA) with Vanquish™ UHPLC  
582 liquid chromatography. An Accucore C18 (100 × 2.1) column was used for metabolites with  
583 solvent A (0.1% formic acid in water) and solution B (0.1% formic acid in acetonitrile). The  
584 column chamber temperature was to 55 °C. Pump flow rate was set to 0.45 mL/min. The LC  
585 gradient was set to 0 min: 1% of solvent B (i.e., 99% of solvent A), 5 min: 1% of B, 6 min: 40%  
586 of B, 7.5 min: 98% of B, 8.5 min: 98% of B, 9 min: 0.1% of B, 10 min stop run. To enhance

587 identification, an Acquire X MSn data acquisition strategy was used which employs replicate  
588 injections for exhaustive sample interrogation and increases the number of compounds in the  
589 sample with distinguishable fragmentation spectra for identification. Electrospray ionization  
590 (ESI) was used in both positive and negative modes with a spray voltage for positive ions (V) =  
591 3500 and a spray voltage for negative ions (V) = 2500. Sheath gas was set to 50, auxiliary gas  
592 was set at 1 and sweep gas was set to 1. The ion transfer tube temperature was set at 325 °C and  
593 the vaporizer temperature was set at 350 °C. Full MS1 used the Orbitrap mass analyzer (Thermo  
594 Fisher Scientific, Waltham, Massachusetts, USA) with a resolution of 120,000, scan range (m/z)  
595 of 55–550, MIT of 50, AGC target of 2e5, 1 microscan, and RF lens set to 50%. For untargeted  
596 lipidomics, a Vanquish HPLC-Q Exactive Plus system was used with an Acclaim C30 column  
597 (2.1 mm × 150 mm, 3µm). Solution A for lipids consisted of 0.1% formic acid, 10 mM  
598 ammonium formate, and 60% acetonitrile. Solution B for lipids consisted of 0.1% formic acid,  
599 10 mM ammonium formate, and 90:10 acetonitrile: isopropyl alcohol. The column chamber  
600 temperature was set to 40 °C. Pump flow rate was set to 0.40 mL/min. The LC gradient was set  
601 to 0 min: 32% of solvent B (i.e., 68% of solvent A), 1.5 min: 45% of B, 5 min: 52% of B, 8 min:  
602 58% of B, 11 min: 66% of B, 14 min: 70% of B, 18 min: 75% of B, 21 min: 97% of B, 26 min:  
603 32% of B, 32 min stop run. The method for Q Exactive Plus mass spectrometer included a 32-  
604 min duration time, 10 s chromatogram peak width with full MS and ddMS2. Ion fragmentation  
605 was induced by HCD, with positive and negative polarity switching and a default charge state of  
606 1. Full MS1 used the Orbitrap mass analyzer with a resolution of 70,000, 1 microscan, AGC  
607 target set to 1e6, and a scan range from 200 to 2000 m/z. The dd-MS2 scan used 1 microscan,  
608 resolution of 35,000, AGC target 5e5, MIT of 46 ms, loop count of 3, isolation window of 1.3  
609 m/z, and a scan range of 200 to 2000 m/z for positive and negative polarity.

610

## 611 **Data analysis for Proteins, Metabolites, and Lipids**

612 For LC-MS/MS proteomic data analysis, we used Proteome Discoverer™ 2.4 (Thermo  
613 Fisher Scientific, Waltham, MA, USA) with the search engine SEQUEST algorithm to process  
614 raw MS files. Spectra were searched using the TAIR10 protein database with the following  
615 parameters: 10 ppm mass tolerance for MS1 and 0.02 da as mass tolerance for MS2, two  
616 maximum missed tryptic cleavage sites, a fixed modification of carbamidomethylation (+57.021)  
617 on cysteine residues, dynamic modifications of oxidation of methionine (+15.996) and  
618 phosphorylation (+79.966) on tyrosine, serine, and threonine. Search results were filtered at 1%  
619 false discovery rate (FDR) and peptide confidence level was set for at least two unique peptides  
620 per protein for protein identification. Relative protein abundance in primed and control *dir1* and  
621 WS guard cell samples was measured using label-free quantification in Proteome Discoverer™  
622 2.4 (Thermo Scientific, Bremen, Germany). Proteins identified and quantified in all 4 out of 4  
623 sample replicates were used. Peptides in mock and primed samples were quantified as area under  
624 the chromatogram peak. Peak areas were normalized by total protein amount. The average  
625 intensity of four primed *dir1* vs. four primed WS samples were compared as a ratio and two  
626 criteria were used to identify significantly altered proteins: (1) increase or decrease of 2-fold  
627 (primed *dir1*/primed WS), and (2) p-value from an unpaired Student's t-test less than 0.05. For  
628 untargeted metabolomics, Compound Discover™ 3.0 Software (Thermo Scientific, Bremen,  
629 Germany) was used for data analyses. Raw files from four replicates of *dir1* primed and four  
630 replicates of WS primed guard cells were used as input. Spectra were processed by aligning  
631 retention times. Detected compounds were grouped and gaps filled using the gap filling node in  
632 Compound Discover that fills in missing peaks or peaks below the detection threshold for  
633 subsequent statistical analysis. Peak area was refined from normalize areas while marking

634 background compounds. Compound identification included predicting compositions, searching  
635 mzCloud spectra database, and assigning compound annotations by searching ChemSpider,  
636 pathway mapping to KEGG pathways and to Metabolika pathways was included for functional  
637 analysis of the metabolites. The metabolites were scored by applying mzLogic and the best score  
638 was kept. Peak areas were normalized by the positive and negative mode internal standards  
639 (lidocaine and camphorsulfonic acid, respectively) added during sample preparation. For  
640 untargeted lipidomics data analyses, Lipid Search 4.1™ and Compound Discover™ 3.0 (Thermo  
641 Scientific, Bremen, Germany) were used. Raw files from three replicates of mock and three  
642 replicates of primed guard cells were uploaded Lipid Search 4.1™ for annotation of lipids found  
643 in all the samples. A mass list was generated for uploading to Compound Discover™ 3.0  
644 Software. This mass list was used for compound identification along with predicted  
645 compositions, searching mzCloud spectra database, and assigning compound annotations by  
646 searching ChemSpider. Peak areas were normalized by median-based normalization. For both  
647 metabolomics and lipidomics, the average areas of four *dir1* primed vs. four WS primed  
648 metabolite samples were compared as a ratio and two criteria were used to determine  
649 significantly altered metabolites or lipids: (1) increase or decrease of 2-fold (*dir1* primed/WS  
650 primed), and (2) p-value from an unpaired Student's t-test less than 0.05.

651

## 652 **Accession Numbers and Data Repository Information**

653 The datasets presented in this study can be found in online repositories. The names of the  
654 repository/repositories and accession number(s) can be found below: All protein MS raw data  
655 and search results have been deposited to the ProteomeXchange Consortium via the PRIDE  
656 partner repository with the data set identifier PXD024991. All metabolite and lipid MS raw data



657 and search results have been deposited to the MetaboLights data repository with the data set  
658 identifier MTBLS2614.

659

## 660 **Supplemental Data**

661 The following supplemental materials are available.

662 **Supplemental Table S1.** Total proteins, metabolites, and lipids identified by LC-MS/MS  
663 from guard cells of WT and *dir1* knockout mutant under control and priming conditions.

664

665 **Supplemental Figure S1.** Singular enrichment analysis (SEA) for biological process  
666 using agriGO v2.0. shows pathway enrichment of proteins related to defense response,  
667 amino acid biosynthesis, and carbon metabolism in guard cells.

668

669 **Supplemental Figure S2.** Singular enrichment analysis (SEA) for cellular components  
670 using agriGO v2.0 shows pathway enrichment of plastid and cell-wall related proteins.

671

672

## 673 **ACKNOWLEDGMENTS**

674 We thank Ms. Angelica Ortega and Mr. Ivan Grela their help with growth and maintenance of  
675 Arabidopsis plants. This material is based upon work supported by the National Science  
676 Foundation under Grant No. 1920420.

677

678

679 **FIGURE LEGENDS**

680 **Figure 1. Pathogen entry and growth differences in mock and primed *dir1* mutant and wild**

681 **type (WT) Arabidopsis leaves. A.** Images showing representative stomatal apertures in mock

682 and primed *dir1* and WT Arabidopsis leaves after 0, 1, and 3 h after secondary exposure to *Pst*

683 DC3000. **B.** Quantitative measurements of 150 stomata from three replicate experiments.

684 Statistically significant differences were marked by a, b, and c. **C.** *Pst* DC 3000 entry results

685 obtained from nine biological replicates of primed and mock *dir1* and WT plants. The data are

686 presented as average  $\pm$  standard error. **D.** *Pst* DC 3000 growth results obtained from nine

687 biological replicates of primed and mock plants. The data are presented as average  $\pm$  standard

688 error with all p-value  $< 0.05$ . cfu, colony forming unit

689

690 **Figure 2. Differential changes of proteins and metabolites in mock and primed *dir1* mutant**

691 **and WT guard cells. A.** Biological functions proteins found in KEGG pathways that are

692 differentially abundant in WT versus *dir1* primed guard cells. **B.** Biological functions

693 metabolites found in KEGG pathways that are differentially abundant in WT versus *dir1* primed

694 guard cells.

695

696 **Figure 3. Overview of the role of DIR1 in carbon metabolism, amino acid biosynthesis, and**

697 **hormone biosynthesis in guard cells during systemic defense response.** Loss of *DIR1* results

698 in altered abundance of proteins, metabolites, and lipids involved in carbon metabolism, amino

<sup>1</sup> This material is based upon work supported by the National Science Foundation under Grant No. 1920420.

<sup>2</sup> Author for contact: schen@ufl.edu

<sup>3</sup> Senior author.

The author responsible for distribution of materials integral to the findings presented in this article in accordance with the policy described in the Instructions for Authors ([www.plantphysiol.org](http://www.plantphysiol.org)) is: Sixue Chen (schen@ufl.edu).

S.C., and L.D. conceived and designed the research; L.D., J.K., J.N., and C.D. carried out all experimental work; L.D. conducted data analysis, and L.D. and S.C. prepared manuscript.

699 acid biosynthesis, biosynthesis of plant hormones and secondary metabolites. Proteins that were  
700 decreased in *dir1* guard cells in the carbon metabolism metabolic pathway included: FBA3, TIM,  
701 TPI, LOS2, PKP $\alpha$ , and ACO2. Proteins that were decreased in *dir1* guard cells in the amino acid  
702 biosynthesis metabolic pathways included: AGD2, CYSC1, CBL, MS2, MTO1, AT4G17830,  
703 and AQI, and decreased metabolites in these pathways included: gly-leu, niacin, acetyl-leucine,  
704 desaminotyrosine, and pyroglutamic acid. One increased metabolite in *dir1* guard cells in the  
705 arginine biosynthesis pathway was aminolevulinic acid. Proteins that were decreased in *dir1*  
706 guard cells in the biosynthesis of hormones and secondary metabolites metabolic pathways  
707 included: MEE32 and MOD1, and decreased metabolites and lipids in these pathways included  
708 salicylic acid, stearic acid (FA 18:0), behenic acid (FA 18:1), cetyl oleate (WE 16:0/18:1) and  
709 ethyl myristate (WE 16:0). One protein, EFE, and one lipid, FAO2 18:1, were increased in these  
710 pathways in the *dir1* primed guard cells versus WT primed guard cells. Please refer to  
711 Supplemental Table 1 for abbreviations.

712

713 **Figure 4. Differentially abundant lipids identified in *dir1* and WT guard cells.** A. Bar graphs  
714 showing decreases of two long-chain fatty acids, stearic acid (FA 18:0) and behenic acid (FA  
715 18:1) and two wax esters, cetyl oleate (WE 16:0/18:1) and ethyl myristate (WE 16:0) decreased  
716 > 2-fold in the *dir1* versus WT guard cells. Chemical structures of stearic acid (FA 18:0),  
717 behenic acid (FA 18:1), cetyl oleate (WE 16:0/18:1) and ethyl myristate (WE 16:0) are shown.  
718 The error bar represents standard deviation of the mean value.

719

720 **Figure 5. Identification of potential interacting proteins with DIR1.** A. Protein interaction  
721 image was generated using Interaction Viewer at [bar.utoronto.ca/eplant](http://bar.utoronto.ca/eplant). Border color indicates

722 protein location. Green lines indicate protein and DNA interactions that have been  
723 experimentally determined. **B.** GeneMANIA tool from [bar.utoronto.ca/eplant](http://bar.utoronto.ca/eplant) was used to predict  
724 other genes/gene products associated with DIR1 (AT5G48485). Predicted, co-expression, and  
725 genetic interaction networks found associated genes/gene products. Proteins identified in guard  
726 cell samples are circled. Circle colors indicate increased (red), decreased (green), or unchanged  
727 (blue) proteins in *dir1* versus WT primed guard cells.

728

729

## Parsed Citations

**Abdel-Ghany, SE (2009) Contribution of plastocyanin isoforms to photosynthesis and copper homeostasis in *Arabidopsis thaliana* grown at different copper regimes. *Planta* 229: 767–779**

Google Scholar: [Author Only](#) [Title Only](#) [Author and Title](#)

**Ádám AL, Nagy ZÁ, Kátay G, Mergenthaler E, Viczián O (2018) Signals of systemic immunity in plants: Progress and open questions. *Int J Mol Sci* 19: 1146-1166**

Google Scholar: [Author Only](#) [Title Only](#) [Author and Title](#)

**Bogdanov, I. V., Shenkarev, Z O., Finkina, E. I., Melnikova, D. N., Rumynskiy, E. I., Arseniev, A. S., & Ovchinnikova, T. V. (2016) A novel lipid transfer protein from the pea *Pisum sativum*: isolation, recombinant expression, solution structure, antifungal activity, lipid binding, and allergenic properties. *BMC Plant Biol*, 16: 107**

Google Scholar: [Author Only](#) [Title Only](#) [Author and Title](#)

**Cornish K, Zeevaart JA (1985) Movement of Abscisic Acid into the Apoplast in Response to Water Stress in *Xanthium strumarium* L. *Plant Physiol* 78: 623-626**

Google Scholar: [Author Only](#) [Title Only](#) [Author and Title](#)

**David L, Harmon AC, Chen S (2019) Plant immune responses - from guard cells and local responses to systemic defense against bacterial pathogens. *Plant Signal Behav* 14: e1588667**

Google Scholar: [Author Only](#) [Title Only](#) [Author and Title](#)

**David L, Kang J, Dufresne D, Zhu D, Chen S (2020) Multi-omics revealed molecular mechanisms underlying guard cell systemic acquired resistance. *Int J Mol Sci*. 27: 191-212**

Google Scholar: [Author Only](#) [Title Only](#) [Author and Title](#)

**David L, Kang J, Chen S (2021) Untargeted metabolomics of *Arabidopsis* stomatal immunity. *Methods Mol Biol* 2200: 413-424**

Google Scholar: [Author Only](#) [Title Only](#) [Author and Title](#)

**Du Z, Zhou X, Ling Y, Zhang Z, Su Z (2010) agriGO: a GO analysis toolkit for the agricultural community. *Nucleic Acids Res* 38(Web Server issue): W64-70**

Google Scholar: [Author Only](#) [Title Only](#) [Author and Title](#)

**Fahlberg P, Buhot N, Johansson ON, Andersson MX (2019) Involvement of lipid transfer proteins in resistance against a non-host powdery mildew in *Arabidopsis thaliana*. *Mol Plant Pathol*. 20: 69-77**

Google Scholar: [Author Only](#) [Title Only](#) [Author and Title](#)

**Junková P, Neubergerová M, Kalachova T, Valentová O, Janda M (2021) Regulation of the microsomal proteome by salicylic acid and deficiency of phosphatidylinositol-4-kinases  $\beta 1$  and  $\beta 2$  in *Arabidopsis thaliana*. *Proteomics* 21: e2000223.**

Google Scholar: [Author Only](#) [Title Only](#) [Author and Title](#)

**Kang J, David L, Cang J, Chen S (2021) Three-in-one simultaneous extraction of proteins, metabolites and lipids for multi-omics. *Front Genet* 12: 635971**

Google Scholar: [Author Only](#) [Title Only](#) [Author and Title](#)

**He M, Ding NZ (2020) Plant unsaturated fatty acids: Multiple roles in stress response. *Front Plant Sci* 11: 562785**

Google Scholar: [Author Only](#) [Title Only](#) [Author and Title](#)

**Hirano SS, Upper CD (2000) Bacteria in the leaf ecosystem with emphasis on *Pseudomonas syringae*-a pathogen, ice nucleus, and epiphyte. *Microbiol Mol Bio Rev* 64 :624-653**

Google Scholar: [Author Only](#) [Title Only](#) [Author and Title](#)

**Lascombe MB, Bakan B, Buhot N, Marion D, Blein JP, Larue V, Lamb C, Prangé T (2008) The structure of "defective in induced resistance" protein of *Arabidopsis thaliana*, DIR1, reveals a new type of lipid transfer protein. *Protein Sci* 17: 1522-1530**

Google Scholar: [Author Only](#) [Title Only](#) [Author and Title](#)

**Li F, Wu X, Lam P, Bird D, Zheng H, Samuels L, Jetter R, Kunst L (2008) Identification of the wax ester synthase/acyl-coenzyme A: diacylglycerol acyltransferase WSD1 required for stem wax ester biosynthesis in *Arabidopsis*. *Plant Physiol* 148: 97-107**

Google Scholar: [Author Only](#) [Title Only](#) [Author and Title](#)

**Lim GH, Shine MB, de Lorenzo L, Yu K, Cui W, Navarre D, Hunt AG, Lee JY, Kachroo A, Kachroo P (2016) Plasmodesmata localizing proteins regulate transport and signaling during systemic acquired immunity in plants. *Cell Host Microbe* 19: 541-549**

Google Scholar: [Author Only](#) [Title Only](#) [Author and Title](#)

**Lim GH, Liu H, Yu K, Liu R, Shine MB, Fernandez J, Burch-Smith T, Mobley JK, McLetchie N, Kachroo A, Kachroo P (2020) The plant cuticle regulates apoplastic transport of salicylic acid during systemic acquired resistance. *Sci Adv* 6: eaaz0478**

Google Scholar: [Author Only](#) [Title Only](#) [Author and Title](#)

**Maldonado AM, Doerner P, Dixon RA, Lamb CJ, Cameron RK (2002) A putative lipid transfer protein involved in systemic resistance signaling in *Arabidopsis*. *Nature* 419: 399-403**

Google Scholar: [Author Only](#) [Title Only](#) [Author and Title](#)

**Mallikarjun V, Clarke DJ, Campbell CJ (2012) Cellular redox potential and the biomolecular electrochemical series: a systems hypothesis. Free Radic Biol Med. 53: 280-288**

Google Scholar: [Author Only Title Only Author and Title](#)

**Martinière A, Gibrat R, Sentenac H, Dumont X, Gaillard I, Paris N (2018) Uncovering pH at both sides of the root plasma membrane interface using noninvasive imaging. Proc Natl Acad Sci 115: 6488-6493**

Google Scholar: [Author Only Title Only Author and Title](#)

**Melotto M, Underwood W, He SY (2008) Role of stomata in plant innate immunity and foliar bacterial diseases. Ann Rev Phytopathol 46: 101-122**

Google Scholar: [Author Only Title Only Author and Title](#)

**Misra BB, Chaturvedi R (2015) When plants brace for the emerging pathogens. Physiol Mol Plant Path. 92: 181-185**

Google Scholar: [Author Only Title Only Author and Title](#)

**Nguyen C, Haushalter RW, Lee DJ, Markwick PR, Bruegger J, Caldara-Festin G, Finzel K, Jackson DR, Ishikawa F, O'Dowd B, McCammon JA, Opella SJ, Tsai SC, Burkart MD (2014) Trapping the dynamic acyl carrier protein in fatty acid biosynthesis. Nature 505: 427-431**

Google Scholar: [Author Only Title Only Author and Title](#)

**Pang Q, Zhang T, Lin C, Kong W, Chen S. (2020) Proteomics and phosphoproteomics revealed molecular networks of stomatal immune responses. Planta 252: 66**

Google Scholar: [Author Only Title Only Author and Title](#)

**Rebaque D, Del Hierro I, López G, Bacete L, Vilaplana F, Dallabernardina P, Pfrengle F, Jordá L, Sánchez-Vallet A, Pérez R, Brunner F, Molina A, Mérida H (2021) Cell wall-derived mixed-linked  $\beta$ -1,3/1,4-glucans trigger immune responses and disease resistance in plants. Plant J 106 :601-615**

Google Scholar: [Author Only Title Only Author and Title](#)

**Saint-Vincent PM, Ridout M, Engle NL, Lawrence TJ, Yeary ML, Tschaplinski TJ, Newcombe G, Pelletier DA (2020) Isolation, characterization, and pathogenicity of two *Pseudomonas syringae* pathovars from *Populus trichocarpa* seeds. Microorganisms 8: 1137-1156**

Google Scholar: [Author Only Title Only Author and Title](#)

**Santelia D, Lawson T (2016) Rethinking guard cell metabolism. Plant Physiol 172:1371-1392**

Google Scholar: [Author Only Title Only Author and Title](#)

**Shah J, Zeier J (2013) Long-distance communication and signal amplification in systemic acquired resistance. Front. Plant Sci. 4:1-16**

Google Scholar: [Author Only Title Only Author and Title](#)

**Sels J, Mathys J, De Coninck BM, Cammue BP, De Bolle MF (2008) Plant pathogenesis-related (PR) proteins: a focus on PR peptides. Plant Physiol Biochem 46: 941-50**

Google Scholar: [Author Only Title Only Author and Title](#)

**Su J, Zhang M, Zhang L, Sun T, Liu Y, Lukowitz W, Xu J, Zhang S (2017) Regulation of stomatal immunity by interdependent functions of a pathogen-responsive MPK3/MPK6 cascade and abscisic acid. Plant Cell 29: 526-542**

Google Scholar: [Author Only Title Only Author and Title](#)

**Wang HQ, Sun LP, Wang LX, Fang XW, Li ZQ, Zhang FF, Hu X, Qi C, He JM (2020) Ethylene mediates salicylic-acid-induced stomatal closure by controlling reactive oxygen species and nitric oxide production in *Arabidopsis*. Plant Sci 294:110464**

Google Scholar: [Author Only Title Only Author and Title](#)

**Weigel M, Varotto C, Pesaresi P, Finazzi G, Rappaport F, Salamini F, Leister D. (2003) Plastocyanin is indispensable for photosynthetic electron flow in *Arabidopsis thaliana*. J Biol Chem 278: 31286-9**

Google Scholar: [Author Only Title Only Author and Title](#)

**Witteck F, Hoffmann T, Kanawati B, Bichlmeier M, Knappe C, Wenig M, Schmitt-Kopplin P, Parker JE, Schwab W, Vlot AC (2014) *Arabidopsis* ENHANCED DISEASE SUSCEPTIBILITY1 promotes systemic acquired resistance via azelaic acid and its precursor 9-oxo nonanoic acid. J Exp Bot 65: 5919-5931**

Google Scholar: [Author Only Title Only Author and Title](#)

**Wong LH, Gatta AT, Levine TP (2019) Lipid transfer proteins: the lipid commute via shuttles, bridges and tubes. Nat Rev Mol Cell Biol 20 :85-101**

Google Scholar: [Author Only Title Only Author and Title](#)

**Yu K, Soares JM, Mandal MK, Wang C, Chanda B, Gifford AN, Fowler JS, Navarre D, Kachroo A, Kachroo P (2013) A feedback regulatory loop between G3P and lipid transfer proteins DIR1 and AZ1 mediates azelaic-acid-induced systemic immunity. Cell Rep. 3:1266-1278**

Google Scholar: [Author Only Title Only Author and Title](#)

**Zhu M, Jeon BW, Geng S, Yu Y, Balmant K, Chen S, Assmann SM (2016) Preparation of epidermal peels and guard cell protoplasts for cellular, electrophysiological, and -omics assays of guard cell function. Methods Mol Biol 1363: 89-121**

Google Scholar: [Author Only Title Only Author and Title](#)

bioRxiv preprint doi: <https://doi.org/10.1101/2021.06.02.446770>; this version posted June 2, 2021. The copyright holder for this preprint (which was not certified by peer review) is the author/funder, who has granted bioRxiv a license to display the preprint in perpetuity. It is made available under a [CC-BY-NC-ND 4.0 International license](#).

**Zhu M, Dai S, Chen S (2012) The stomata frontline of plant interaction with the environment-perspectives from hormone regulation. Front Biol 7: 96-112**

Google Scholar: [Author Only](#) [Title Only](#) [Author and Title](#)
